# Supplementary material
Source: Springer Nature journal article supplement (https://www.springermedizin.de/resource/supplementary/12937_2013_648_MOESM3_ESM.pdf/25653866)

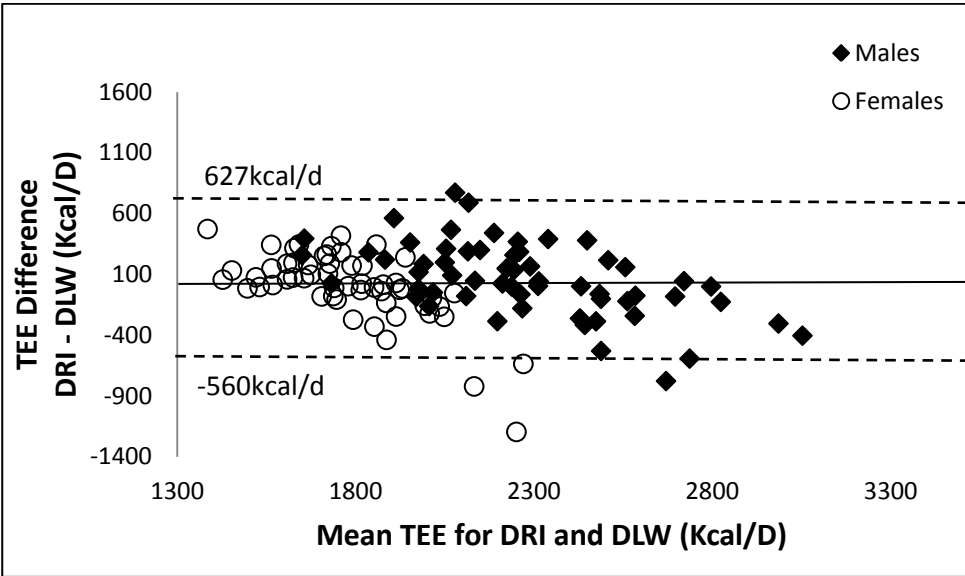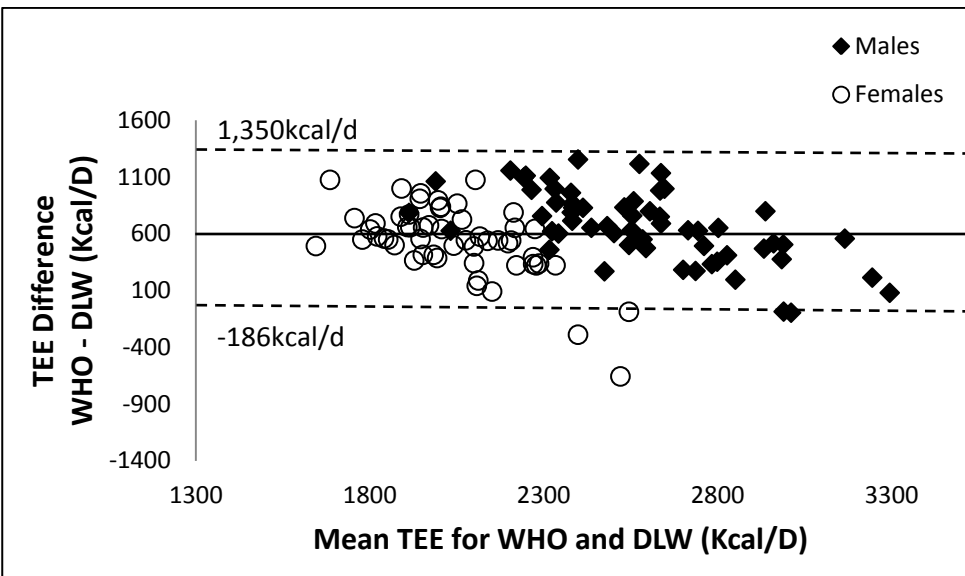

Supplement: MOESM3 [file 25653866]
